# Supplementary material for: Zinc Oxide Nanoparticles as Potential Delivery Carrier: Green Synthesis by Aspergillus niger Endophytic Fungus, Characterization, and In Vitro/In Vivo Antibacterial Activity
Source: MDPI journal article supplement (doi:10.3390/ph15091057), 2022-08-26
Supplement: s1 [file s1]

Table S1. Sequences of the utilized primers

| Gene        | Primer sequence (5' to 3')                                |
|-------------|-----------------------------------------------------------|
| <i>fnbA</i> | Fw: CAGTAGCTGAATTCCCATTTCCTTC<br>Rv: AAATTGGGAGCAGCATCAGT |
| <i>fnbB</i> | Fw: ACGCTCAAGGCGACGGCAAAG<br>Rv: ACCTTCTGCATGACCTTCTGCACC |
| <i>ebpS</i> | Fw: GCTGCGCCTCCAGCCAAACCT<br>Rv: GTGCAGCTGGTGCAATGGGTGT   |
| <i>icaC</i> | Fw: TCTTGGGTATTTGCACGCAT<br>Rv: GCAATATCATGCCGACACCT      |
| 16srRNA     | Fw: GGGACCCGCACAAGCGGTGG<br>Rv: GGGTTGCGCTCGTTGCGGGA      |

Table S2. MIC values of ZnO NPs against *S. aureus* clinical isolates.

| Isolate code | MIC (µg/mL) | Isolate code | MIC (µg/mL) |
|--------------|-------------|--------------|-------------|
| S1           | 128         | S13          | 128         |
| S2           | 64          | S14          | 64          |
| S3           | 8           | S15          | 64          |
| S4           | 32          | S16          | 32          |
| S5           | 64          | S17          | 32          |
| S6           | 64          | S18          | 16          |
| S7           | 32          | S19          | 8           |
| S8           | 16          | S20          | 128         |
| S9           | 8           | S21          | 64          |
| S10          | 8           | S22          | 16          |
| S11          | 16          | S23          | 16          |
| S12          | 8           | S24          | 8           |
